# Supplementary material
Source: PubMed Central journal article supplement (PMC2823579)

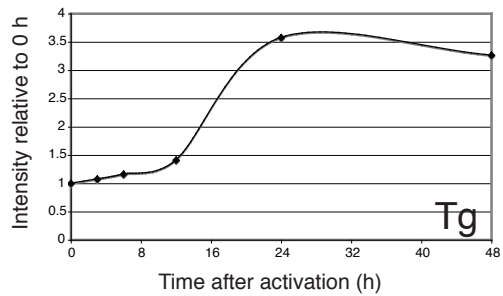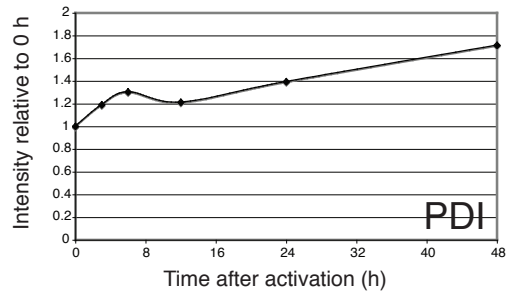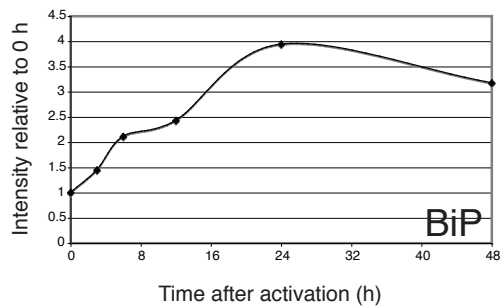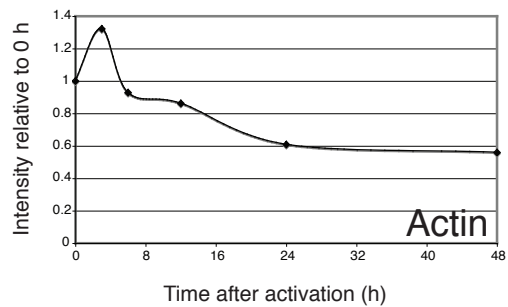

Supplement: supp_123_5_787__1.pdf [file supp_123_5_787__1.pdf]
